# Supplementary material for: The Power of an Infant's Smile: Maternal Physiological Responses to Infant Emotional Expressions
Source: PubMed Central journal article supplement (PMC4465828; doi:10.1371/journal.pone.0129672), 2015-06-11
Supplement: pone.0129672.s004.pdf [file pone.0129672.s004.pdf]

**S1 Table.** Descriptive statistics of physiological measures during baseline and cry phases for Table 1.

| Source                |                        | Condition |        |          |       |       |
|-----------------------|------------------------|-----------|--------|----------|-------|-------|
|                       |                        | Neutral   |        | Smile    |       |       |
|                       |                        | Baseline  | Cry    | Baseline | Cry   |       |
| BVPa ( $\mu$ V)       | Mean                   | 42.12     | 37.89  | 58.75    | 48.01 |       |
|                       | Std. Error of Mean     | 4.08      | 3.10   | 5.13     | 2.52  |       |
|                       | Median                 | 45.30     | 36.41  | 52.07    | 46.25 |       |
|                       | Std. Deviation         | 14.72     | 11.17  | 18.51    | 9.10  |       |
|                       | Variance               | 216.66    | 124.74 | 342.66   | 82.88 |       |
|                       | Skewness               | -0.01     | 0.68   | 0.78     | -0.38 |       |
|                       | Std. Error of Kurtosis | 0.62      | 0.62   | 0.62     | 0.62  |       |
|                       | Std. Error of Kurtosis | -1.14     | 0.61   | -0.76    | 0.13  |       |
|                       | Std. Error of Range    | 1.19      | 1.19   | 1.19     | 1.19  |       |
|                       | Range                  | 43.54     | 39.91  | 55.44    | 31.94 |       |
|                       | Percentile             | 25        | 26.96  | 31.14    | 45.98 | 43.73 |
|                       |                        | 50        | 45.30  | 36.41    | 52.07 | 46.25 |
|                       |                        | 75        | 53.43  | 44.74    | 78.17 | 54.76 |
| HR (bpm)              | Mean                   | 71.87     | 70.17  | 70.63    | 69.76 |       |
|                       | Std. Error of Mean     | 1.79      | 1.65   | 1.94     | 1.86  |       |
|                       | Median                 | 71.27     | 71.47  | 72.27    | 72.27 |       |
|                       | Std. Deviation         | 6.92      | 6.39   | 7.52     | 7.19  |       |
|                       | Variance               | 47.83     | 40.79  | 56.55    | 51.63 |       |
|                       | Skewness               | -0.04     | -0.23  | 0.03     | -0.18 |       |
|                       | Std. Error of Kurtosis | 0.58      | 0.58   | 0.58     | 0.58  |       |
|                       | Std. Error of Kurtosis | -0.80     | -0.71  | -1.58    | -1.07 |       |
|                       | Std. Error of Range    | 1.12      | 1.12   | 1.12     | 1.12  |       |
|                       | Range                  | 22.85     | 21.77  | 22.92    | 23.59 |       |
|                       | Percentile             | 25        | 65.42  | 65.30    | 64.15 | 63.42 |
|                       |                        | 50        | 71.27  | 71.47    | 72.27 | 72.27 |
|                       |                        | 75        | 77.25  | 75.51    | 77.60 | 75.06 |
| RSP (B/Min.)          | Mean                   | 17.22     | 18.79  | 16.30    | 18.98 |       |
|                       | Std. Error of Mean     | 0.95      | 0.83   | 0.91     | 0.66  |       |
|                       | Median                 | 17.32     | 19.71  | 16.25    | 19.33 |       |
|                       | Std. Deviation         | 3.70      | 3.21   | 3.51     | 2.55  |       |
|                       | Variance               | 13.68     | 10.31  | 12.33    | 6.50  |       |
|                       | Skewness               | 0.62      | -0.80  | -0.75    | -0.84 |       |
|                       | Std. Error of Kurtosis | 0.58      | 0.58   | 0.58     | 0.58  |       |
|                       | Std. Error of Kurtosis | 0.08      | 0.33   | 2.07     | 0.13  |       |
|                       | Std. Error of Range    | 1.12      | 1.12   | 1.12     | 1.12  |       |
|                       | Range                  | 13.36     | 11.71  | 14.64    | 8.42  |       |
|                       | Percentile             | 25        | 14.28  | 17.93    | 14.88 | 17.11 |
|                       |                        | 50        | 17.32  | 19.71    | 16.25 | 19.33 |
|                       |                        | 75        | 19.32  | 20.52    | 18.90 | 21.52 |
| SC ( $\log(\mu$ S+1)) | Mean                   | 0.38      | 0.45   | 0.33     | 0.47  |       |
|                       | Std. Error of Mean     | 0.05      | 0.05   | 0.06     | 0.07  |       |
|                       | Median                 | 0.33      | 0.40   | 0.24     | 0.43  |       |
|                       | Std. Deviation         | 0.17      | 0.20   | 0.20     | 0.26  |       |
|                       | Variance               | 0.03      | 0.04   | 0.04     | 0.07  |       |
|                       | Skewness               | 0.63      | 0.54   | 1.04     | 0.37  |       |
|                       | Std. Error of Kurtosis | 0.62      | 0.62   | 0.62     | 0.62  |       |
|                       | Std. Error of Kurtosis | -0.82     | -0.70  | -0.16    | -1.18 |       |
|                       | Std. Error of Range    | 1.19      | 1.19   | 1.19     | 1.19  |       |
|                       | Range                  | 0.50      | 0.61   | 0.60     | 0.73  |       |
|                       | Percentile             | 25        | 0.23   | 0.28     | 0.17  | 0.20  |
|                       |                        | 50        | 0.33   | 0.40     | 0.24  | 0.43  |
|                       |                        | 75        | 0.53   | 0.61     | 0.50  | 0.70  |
