# Supplementary material for: The Power of an Infant's Smile: Maternal Physiological Responses to Infant Emotional Expressions
Source: PubMed Central journal article supplement (PMC4465828; doi:10.1371/journal.pone.0129672), 2015-06-11
Supplement: pone.0129672.s005.pdf [file pone.0129672.s005.pdf]

**S2 Table.** Results of two-way ANOVA for Table 1.

|                 |                 | Type III Sum<br>of Squares | df | Mean<br>Square | F       | Sig.    | Partial<br>Eta<br>Squared |
|-----------------|-----------------|----------------------------|----|----------------|---------|---------|---------------------------|
| BVPa ( $\mu$ V) | Intercept       | 113370.56                  | 1  | 113370.56      | 340.19  | 0.00    | 0.92                      |
|                 | Condition       | 2324.60                    | 1  | 2324.60        | 6.98    | *0.01   | 0.02                      |
|                 | Phase           | 727.97                     | 1  | 727.97         | 14.50   | *0.00   | 0.35                      |
|                 | Phase*Condition | 137.41                     | 1  | 137.41         | 2.74    | 0.11    | 0.07                      |
|                 | Error           | 1205.19                    | 24 | 50.22          |         |         | 0.58                      |
| HR(bpm)         | Intercept       | 299123.32                  | 1  | 299123.32      | 3175.57 | 0.00    | 0.99                      |
|                 | Condition       | 10.27                      | 1  | 10.27          | 0.11    | 0.74    | 0.00                      |
|                 | Phase           | 24.73                      | 1  | 24.73          | 5.88    | *0.02   | 0.17                      |
|                 | Phase*Condition | 2.60                       | 1  | 2.60           | 0.62    | 0.44    | 0.02                      |
|                 | Error           | 117.77                     | 28 | 4.21           |         |         |                           |
| RSP (B/Min.)    | Intercept       | 19054.00                   | 1  | 19054.00       | 1273.85 | 0.00    | 0.98                      |
|                 | Condition       | 2.00                       | 1  | 2.00           | 0.13    | 0.72    | 0.00                      |
|                 | Phase           | 67.90                      | 1  | 67.90          | 10.52   | ***0.00 | 0.27                      |
|                 | Phase*Condition | 4.57                       | 1  | 4.57           | 0.71    | 0.41    | 0.02                      |
|                 | Error           | 180.68                     | 28 | 6.45           |         |         |                           |
| SC ( $\mu$ S)   | Intercept       | 8.61                       | 1  | 8.61           | 106.10  | 0.00    | 0.82                      |
|                 | Condition       | 0.00                       | 1  | 0.00           | 0.04    | 0.84    | 0.00                      |
|                 | Phase           | 0.13                       | 1  | 0.13           | 25.88   | ***0.00 | 0.49                      |
|                 | Phase*Condition | 0.02                       | 1  | 0.02           | 3.13    | 0.09    | 0.06                      |
|                 | Error           | 0.12                       | 24 | 0.01           |         |         | 0.45                      |

Phase= {Baseline, Cry}, Condition={Neutral, Smile}

Sig.: Significance Probability, df: Degree of Freedom, \*p<0.05, \*\*\*p<0.001
