# Supplementary material for: The Power of an Infant's Smile: Maternal Physiological Responses to Infant Emotional Expressions
Source: PubMed Central journal article supplement (PMC4465828; doi:10.1371/journal.pone.0129672), 2015-06-11
Supplement: pone.0129672.s006.pdf [file pone.0129672.s006.pdf]

**S3 Table.** Descriptive statistics of physiological measures (change scores) during cry and experimental phases for Table 2.

| Source             |                      | Condition |        |        |        |        |        |        |        |        |
|--------------------|----------------------|-----------|--------|--------|--------|--------|--------|--------|--------|--------|
|                    |                      | Neutral   |        |        |        | Smile  |        |        |        |        |
|                    |                      | Cry       | Exp1   | Exp2   | Exp3   | Cry    | Exp1   | Exp2   | Exp3   |        |
| BVPa (%)           | Mean                 | 93.90     | 105.37 | 108.27 | 108.82 | 84.80  | 100.03 | 100.58 | 97.13  |        |
|                    | Std. Error of Mean   | 5.63      | 6.61   | 5.98   | 5.46   | 3.69   | 4.78   | 4.79   | 5.14   |        |
|                    | Median               | 91.79     | 105.75 | 107.74 | 109.15 | 86.95  | 101.21 | 101.17 | 94.83  |        |
|                    | Std. Deviation       | 20.32     | 23.82  | 21.55  | 19.69  | 13.30  | 17.22  | 17.28  | 18.55  |        |
|                    | Variance             | 4.13      | 5.67   | 4.64   | 3.88   | 1.77   | 2.97   | 2.99   | 3.44   |        |
|                    | Skewness             | 136.43    | 110.05 | 75.30  | 69.83  | -23.63 | -11.42 | 24.22  | 20.59  |        |
|                    | Std. Error of        | 61.63     | 61.63  | 61.63  | 61.63  | 61.63  | 61.63  | 61.63  | 61.63  |        |
|                    | Kurtosis             | 223.20    | 199.17 | 101.58 | 63.13  | -25.02 | -62.01 | 126.60 | 68.42  |        |
|                    | Std. Error of        | 119.09    | 119.09 | 119.09 | 119.09 | 119.09 | 119.09 | 119.09 | 119.09 |        |
|                    | Range                | 76.71     | 90.85  | 82.49  | 73.82  | 46.98  | 57.43  | 70.32  | 71.35  |        |
|                    | Percentile           | 25        | 81.38  | 86.30  | 92.84  | 92.95  | 74.63  | 88.53  | 89.75  | 88.43  |
|                    |                      | 50        | 91.79  | 105.75 | 107.74 | 109.15 | 86.95  | 101.21 | 101.17 | 94.83  |
|                    |                      | 75        | 99.25  | 113.26 | 121.56 | 120.32 | 94.84  | 118.68 | 108.76 | 106.60 |
|                    | HR (bpm)             | Mean      | -1.88  | -3.47  | -3.35  | -2.77  | -1.05  | -2.89  | -2.09  | -1.72  |
| Std. Error of Mean |                      | 0.62      | 0.84   | 0.80   | 0.77   | 0.86   | 1.01   | 1.13   | 1.16   |        |
| Median             |                      | -1.69     | -3.12  | -3.75  | -2.64  | -1.84  | -4.32  | -2.13  | -1.61  |        |
| Std. Deviation     |                      | 2.39      | 3.27   | 3.11   | 2.98   | 3.32   | 3.90   | 4.37   | 4.47   |        |
| Variance           |                      | 5.72      | 10.71  | 9.67   | 8.86   | 11.05  | 15.23  | 19.09  | 20.02  |        |
| Skewness           |                      | -1.08     | -0.37  | -0.37  | -0.56  | 1.17   | 0.30   | 0.37   | 0.43   |        |
| Std. Error of      |                      | 0.58      | 0.58   | 0.58   | 0.58   | 0.58   | 0.58   | 0.58   | 0.58   |        |
| Kurtosis           |                      | 1.05      | -0.64  | -0.30  | -0.35  | 2.26   | 0.00   | 0.85   | 2.13   |        |
| Std. Error of      |                      | 1.12      | 1.12   | 1.12   | 1.12   | 1.12   | 1.12   | 1.12   | 1.12   |        |
| Range              |                      | 8.18      | 10.93  | 11.29  | 10.49  | 12.76  | 14.87  | 17.83  | 19.19  |        |
| Percentile         |                      | 25        | -2.62  | -6.23  | -5.22  | -4.83  | -3.63  | -5.73  | -5.49  | -3.75  |
|                    |                      | 50        | -1.69  | -3.12  | -3.75  | -2.64  | -1.84  | -4.32  | -2.13  | -1.61  |
|                    |                      | 75        | 0.40   | -1.22  | -0.91  | -0.18  | 0.85   | 0.58   | -0.18  | 0.58   |
| RSP (B/Min.)       |                      | Mean      | 1.78   | 1.47   | 1.39   | 1.64   | 2.68   | 2.47   | 2.30   | 2.06   |
|                    | Std. Error of Mean   | 1.02      | 0.99   | 0.89   | 0.82   | 0.85   | 1.21   | 1.35   | 1.26   |        |
|                    | Median               | 1.60      | 1.35   | 0.89   | 1.54   | 2.64   | 2.31   | 2.04   | 1.07   |        |
|                    | Std. Deviation       | 3.96      | 3.83   | 3.45   | 3.16   | 3.31   | 4.67   | 5.24   | 4.90   |        |
|                    | Variance             | 15.66     | 14.70  | 11.91  | 10.00  | 10.96  | 21.81  | 27.49  | 24.00  |        |
|                    | Skewness             | 0.27      | 0.59   | 0.77   | 0.66   | -0.29  | 0.87   | 0.77   | 0.04   |        |
|                    | Std. Error of        | 0.58      | 0.58   | 0.58   | 0.58   | 0.58   | 0.58   | 0.58   | 0.58   |        |
|                    | Kurtosis             | 0.46      | 0.72   | 0.94   | 1.27   | -1.28  | 1.37   | -0.17  | 0.87   |        |
|                    | Std. Error of        | 1.12      | 1.12   | 1.12   | 1.12   | 1.12   | 1.12   | 1.12   | 1.12   |        |
|                    | Range                | 15.13     | 15.15  | 13.71  | 12.93  | 10.05  | 18.45  | 16.79  | 19.59  |        |
|                    | Percentile           | 25        | -0.97  | -0.65  | -1.27  | -1.34  | 0.00   | -0.77  | -1.77  | 0.13   |
|                    |                      | 50        | 1.60   | 1.35   | 0.89   | 1.54   | 2.64   | 2.31   | 2.04   | 1.07   |
|                    |                      | 75        | 5.05   | 2.92   | 3.02   | 3.36   | 5.59   | 5.45   | 3.89   | 5.22   |
|                    | SC (log( $\mu$ S+1)) | Mean      | 0.07   | 0.07   | 0.08   | 0.08   | 0.14   | 0.13   | 0.12   | 0.09   |
| Std. Error of Mean |                      | 0.01      | 0.02   | 0.02   | 0.02   | 0.04   | 0.04   | 0.04   | 0.03   |        |
| Median             |                      | 0.06      | 0.05   | 0.05   | 0.06   | 0.12   | 0.14   | 0.08   | 0.05   |        |
| Std. Deviation     |                      | 0.05      | 0.07   | 0.08   | 0.08   | 0.14   | 0.15   | 0.14   | 0.12   |        |
| Variance           |                      | 0.00      | 0.01   | 0.01   | 0.01   | 0.02   | 0.02   | 0.02   | 0.02   |        |
| Skewness           |                      | 0.41      | 0.23   | 0.47   | 0.73   | 0.79   | 0.55   | 0.40   | 0.20   |        |
| Std. Error of      |                      | 0.62      | 0.62   | 0.62   | 0.62   | 0.62   | 0.62   | 0.62   | 0.62   |        |
| Kurtosis           |                      | -1.38     | -1.64  | -1.27  | -0.38  | -0.46  | -0.85  | -0.72  | -0.45  |        |
| Std. Error of      |                      | 1.19      | 1.19   | 1.19   | 1.19   | 1.19   | 1.19   | 1.19   | 1.19   |        |
| Range              |                      | 0.13      | 0.20   | 0.23   | 0.24   | 0.41   | 0.45   | 0.46   | 0.43   |        |
| Percentile         |                      | 25        | 0.02   | 0.01   | 0.01   | 0.01   | 0.02   | 0.02   | 0.02   | 0.01   |
|                    |                      | 50        | 0.06   | 0.05   | 0.05   | 0.06   | 0.12   | 0.14   | 0.08   | 0.05   |
|                    |                      | 75        | 0.12   | 0.15   | 0.15   | 0.14   | 0.23   | 0.24   | 0.22   | 0.18   |
