# Supplementary material for: The Power of an Infant's Smile: Maternal Physiological Responses to Infant Emotional Expressions
Source: PubMed Central journal article supplement (PMC4465828; doi:10.1371/journal.pone.0129672), 2015-06-11
Supplement: pone.0129672.s007.pdf [file pone.0129672.s007.pdf]

**S4 Table.** Results of two-way ANOVA (related to Fig. 2).

|              |                 | Type III Sum of Squares | df              | Mean Square | F      | Sig.    | Partial Eta Squared |
|--------------|-----------------|-------------------------|-----------------|-------------|--------|---------|---------------------|
| BVPa (%)     | Intercept       | 1037160.98              | 1               | 1037160.98  | 802.55 | 0.00    | 0.97                |
|              | Condition       | 1857.37                 | 1               | 1857.37     | 1.44   | 0.24    | 0.00                |
|              | Phase           | 3875.57                 | 3               | 1291.86     | 21.35  | ***0.00 | 0.46                |
|              | Phase*Condition | 137.34                  | 3               | 45.78       | 0.76   | 0.52    | 0.02                |
|              | Error           | 4357.55                 | 72              | 60.52       |        |         |                     |
| HR (bpm)     | Intercept       | 693.26                  | 1               | 693.26      | 16.75  | 0.00    | 0.37                |
|              | Condition       | 25.80                   | 1               | 25.80       | 0.62   | 0.44    | 0.01                |
|              | Phase           | 48.26                   | 3 <sup>a</sup>  | 24.09       | 5.49   | *0.00   | 0.16                |
|              | Phase*Condition | 1.92                    | 3 <sup>a</sup>  | 0.96        | 0.22   | 0.80    | 0.01                |
|              | Error           | 245.97                  | 84 <sup>a</sup> | 4.38        |        |         |                     |
| RSP (B/Min.) | Intercept       | 467.12                  | 1               | 467.12      | 7.98   | 0.00    | 0.22                |
|              | Condition       | 19.67                   | 1               | 19.67       | 0.34   | 0.57    | 0.01                |
|              | Phase           | 2.94                    | 3               | 0.98        | 0.30   | 0.82    | 0.01                |
|              | Phase*Condition | 1.52                    | 3               | 0.51        | 0.16   | 0.93    | 0.01                |
|              | Error           | 272.50                  | 84              | 3.24        |        |         |                     |
| SC (μS)      | Intercept       | 0.98                    | 1               | 0.98        | 22.42  | 0.48    | 0.47                |
|              | Condition       | 0.05                    | 1               | 0.05        | 1.19   | *0.04   | 0.03                |
|              | Phase           | 0.01                    | 3 <sup>a</sup>  | 0.00        | 2.29   | 0.13    | 0.07                |
|              | Phase*Condition | 0.01                    | 3 <sup>a</sup>  | 0.01        | 4.89   | *0.01   | 0.16                |
|              | Error           | 0.06                    | 72 <sup>a</sup> | 0.00        |        |         |                     |

Phase= {Cry, Experimental-1, Experimental-2, Experimental-3}, Condition={Neutral, Smile}

Sig.: Significance Probability, df: Degree of Freedom, \* $p < 0.05$ , \*\*\* $p < 0.001$

a)The Greenhouse-Geisser adjustment was applied to correct for sphericity. Table shows uncorrected degrees of freedom.
