# Supplementary material for: The Power of an Infant's Smile: Maternal Physiological Responses to Infant Emotional Expressions
Source: PubMed Central journal article supplement (PMC4465828; doi:10.1371/journal.pone.0129672), 2015-06-11
Supplement: pone.0129672.s008.pdf [file pone.0129672.s008.pdf]

**S5 Table.** Descriptive statistics of psychological measures at response points (pre-cry and post-experimental phases).

| Source   |                        | Condition |                                        |         |                                      |       |
|----------|------------------------|-----------|----------------------------------------|---------|--------------------------------------|-------|
|          |                        | Pre-Cry   | Neutral<br>(n=15)<br>Post-Experimental | Pre-Cry | Smile<br>(n=15)<br>Post-Experimental |       |
| PANAS    |                        |           |                                        |         |                                      |       |
| Positive | Mean                   |           | 2.19                                   | 2.03    | 2.49                                 | 2.33  |
|          | Std. Error of Mean     |           | 0.19                                   | 0.22    | 0.19                                 | 0.21  |
|          | Median                 |           | 1.88                                   | 1.88    | 2.25                                 | 2.38  |
|          | Std. Deviation         |           | 0.75                                   | 0.87    | 0.75                                 | 0.81  |
|          | Variance               |           | 0.56                                   | 0.76    | 0.56                                 | 0.66  |
|          | Skewness               |           | 0.59                                   | 0.66    | -0.07                                | 0.40  |
|          | Std. Error of Kurtosis |           | 0.58                                   | 0.58    | 0.58                                 | 0.58  |
|          | Std. Error of          |           | -0.87                                  | 0.27    | -0.96                                | -1.11 |
|          | Range                  |           | 1.12                                   | 1.12    | 1.12                                 | 1.12  |
|          | Percentile             |           | 2.38                                   | 3.13    | 2.50                                 | 2.50  |
|          |                        | 25        | 1.50                                   | 1.38    | 2.00                                 | 1.63  |
|          |                        | 50        | 1.88                                   | 1.88    | 2.25                                 | 2.38  |
|          |                        | 75        | 3.00                                   | 2.75    | 3.13                                 | 3.13  |
| Negative | Mean                   |           | 1.25                                   | 2.09    | 1.48                                 | 1.77  |
|          | Std. Error of Mean     |           | 0.11                                   | 0.22    | 0.15                                 | 0.26  |
|          | Median                 |           | 1.13                                   | 2.13    | 1.25                                 | 1.13  |
|          | Std. Deviation         |           | 0.43                                   | 0.86    | 0.56                                 | 1.03  |
|          | Variance               |           | 0.18                                   | 0.74    | 0.32                                 | 1.05  |
|          | Skewness               |           | 2.39                                   | 0.56    | 1.13                                 | 1.09  |
|          | Std. Error of Kurtosis |           | 0.58                                   | 0.58    | 0.58                                 | 0.58  |
|          | Std. Error of          |           | 5.36                                   | -0.60   | -0.06                                | -0.42 |
|          | Range                  |           | 1.12                                   | 1.12    | 1.12                                 | 1.12  |
|          | Percentile             |           | 1.50                                   | 2.75    | 1.63                                 | 2.88  |
|          |                        | 25        | 1.00                                   | 1.38    | 1.00                                 | 1.00  |
|          |                        | 50        | 1.13                                   | 2.13    | 1.25                                 | 1.13  |
|          |                        | 75        | 1.25                                   | 2.63    | 1.75                                 | 2.88  |
