# Supplementary material for: The Power of an Infant's Smile: Maternal Physiological Responses to Infant Emotional Expressions
Source: PubMed Central journal article supplement (PMC4465828; doi:10.1371/journal.pone.0129672), 2015-06-11
Supplement: pone.0129672.s009.pdf [file pone.0129672.s009.pdf]

**S6 Table.** Results of two-way ANOVA for Table 3.

|              |                              | Type III Sum<br>of Squares | df | Mean<br>Square | F      | Sig.  | Partial<br>Eta<br>Squared |
|--------------|------------------------------|----------------------------|----|----------------|--------|-------|---------------------------|
| <b>PANAS</b> |                              |                            |    |                |        |       |                           |
| Positive     | Intercept                    | 307.13                     | 1  | 307.13         | 270.19 | 0.00  | 0.90                      |
|              | Condition                    | 1.35                       | 1  | 1.35           | 1.19   | 0.29  | 0.00                      |
|              | Response point               | 0.38                       | 1  | 0.38           | 2.96   | 0.10  | 0.10                      |
|              | Response point*<br>Condition | 0.00                       | 1  | 0.00           | 0.00   | 1.00  | 0.00                      |
|              | Error                        | 3.56                       | 28 | 0.13           |        |       |                           |
| Negative     | Intercept                    | 162.94                     | 1  | 162.94         | 210.60 | 0.00  | 0.88                      |
|              | Condition                    | 0.03                       | 1  | 0.03           | 0.04   | 0.84  | 0.00                      |
|              | Response point               | 4.75                       | 1  | 4.75           | 12.81  | *0.00 | 0.29                      |
|              | Response point*<br>Condition | 1.17                       | 1  | 1.17           | 3.16   | 0.09  | 0.07                      |
|              | Error                        | 10.37                      | 28 | 0.37           |        |       |                           |

Response point= {Pre-Cry phase, Post-Experimental phase}, Condition={Neutral, Smile}

Sig.: Significance Probability, df: Degree of Freedom, \*p<0.05
